# Supplementary material for: Higher Radiation Dose to the Immune Cells Correlates with Worse Tumor Control and Overall Survival in Patients with Stage III NSCLC: A Secondary Analysis of RTOG0617
Source: MDPI journal article supplement (doi:10.3390/cancers13246193), 2021-12-08
Supplement: s1 [file s1]

**Table S1.** Patient characteristics and their effects on survival.

| Characteristics                 | Dose <67 Gy ( <i>n</i> = 285) | Dose ≥67 Gy ( <i>n</i> = 171) | Total ( <i>n</i> = 456) | <i>p</i> |
|---------------------------------|-------------------------------|-------------------------------|-------------------------|----------|
| Age (years)                     | 64 (37–82)                    | 64 (41–84)                    | 64 (37–84)              | 0.89     |
| Gender                          |                               |                               |                         | 0.43     |
| Male                            | 174 (61%)                     | 98 (57%)                      | 272 (60%)               |          |
| Female                          | 111(39%)                      | 73 (43%)                      | 184 (40%)               |          |
| Race                            |                               |                               |                         | 0.44     |
| White                           | 242 (85%)                     | 152 (89%)                     | 394 (86%)               |          |
| Black                           | 31 (11%)                      | 13 (8%)                       | 44 (10%)                |          |
| Others                          | 12 (4%)                       | 6 (3%)                        | 18 (4%)                 |          |
| Zubrod status                   |                               |                               |                         | 0.90     |
| 0                               | 170 (60%)                     | 101 (59%)                     | 271 (59%)               |          |
| 1                               | 115 (40%)                     | 70 (41%)                      | 185 (41%)               |          |
| Histology                       |                               |                               |                         | 0.68     |
| Squamous                        | 122 (43%)                     | 73 (43%)                      | 195 (43%)               |          |
| Adeno                           | 114 (40%)                     | 65 (38%)                      | 179 (39%)               |          |
| Others                          | 48 (17%)                      | 33 (19%)                      | 81 (18%)                |          |
| AJCC stage                      |                               |                               |                         | 0.73     |
| IIIa                            | 190 (67%)                     | 111 (65%)                     | 301 (66%)               |          |
| IIIb                            | 94 (33%)                      | 59 (35%)                      | 153 (34%)               |          |
| RT technique                    |                               |                               |                         | 0.48     |
| 3D-CRT                          | 153 (54%)                     | 86 (50%)                      | 239 (52%)               |          |
| IMRT                            | 132 (46%)                     | 85 (50%)                      | 217 (48%)               |          |
| PET staging                     |                               |                               |                         | 0.37     |
| No                              | 23 (8%)                       | 18 (11%)                      | 41 (9%)                 |          |
| Yes                             | 262 (92%)                     | 153 (90%)                     | 415 (91%)               |          |
| Tumor location                  |                               |                               |                         | 0.48     |
| LLL/central                     | 32 (11%)                      | 23 (14%)                      | 55 (12%)                |          |
| Others                          | 253 (89%)                     | 148 (87%)                     | 401 (88%)               |          |
| Weight loss/month               | 0 (0–9%)                      | 0 (0–7%)                      | 0 (0–9%)                | 0.99     |
| Esophagitis grade               |                               |                               |                         | 0.03     |
| Grade <3                        | 253 (89%)                     | 139 (81%)                     | 392 (86%)               |          |
| Grade ≥3                        | 32 (11%)                      | 32 (19%)                      | 64 (14%)                |          |
| Received full chemo             |                               |                               |                         | 0.095    |
| No                              | 42 (15%)                      | 16 (9%)                       | 58 (13%)                |          |
| Yes                             | 243 (85%)                     | 155 (91%)                     | 398 (87%)               |          |
| GTV (cc)                        | 92.7 (4.6–960.7)              | 93.7 (5.4–698.9)              | 92.7 (4.6–961)          | 0.48     |
| Mean lung dose (Gy)             | 17.4 (5.4–31.7)               | 20.1 (5.1–32.7)               | 18.4 (5.1–32.7)         | <0.0001  |
| Mean heart dose (Gy)            | 13.2 (0–47.1)                 | 12.6 (0.4–49.4)               | 12.7 (0–49.4)           | 0.45     |
| Integral total body dose (Gy•L) | 206 (62–545)                  | 244 (104–464)                 | 218 (62–545)            | <0.0001  |
| EDIC (Gy)                       | 5.58 (2.05–12.20)             | 6.34 (2.14–11.59)             | 5.94 (2.05–12.2)        | <0.0001  |

Abbreviations: RT, Radiotherapy; 3D-CRT, 3-D conformal radiation therapy; IMRT, intensity modulated radiation therapy; LLL, low left lobe; GTV, gross tumor volume; EDIC, effective dose to immune cells; OS, overall survival; PFS, progression-free survival; LPFS, local progression-free survival.
